# Supplementary material
Source: publisher site journal article supplement (https://www.dovepress.com/get_supplementary_file.php?f=447272.docx)
Supplement: Supplementary file 1 [file get_supplementary_file.php]

**Supplementary Table 1. Multivariate logistic regression model to assess the relationship between mixed aortic valve disease and Predominant Aortic Stenosis.**

|  | Univariate analysis | | Multivariate analysis | |
| --- | --- | --- | --- | --- |
| Variables | OR(95% CI) | P value | OR(95% CI) | P value |
| Age | 0.956 (0.913 - 1.001) | 0.057 | 0.952 (0.902 - 1.006) | 0.079 |
| Male | 1.001 (0.562 - 1.782) | 0.998 |  |  |
| Hypertension | 0.598 (0.329 - 1.085) | 0.091 | 0.750 (0.387 - 1.453) | 0.394 |
| CAD | 0.753 (0.385 - 1.472) | 0.406 |  |  |
| Mean gradient | 0.982 (0.967 - 0.996) | 0.016 | 0.974 (0.945 - 1.004) | 0.090 |
| Peak velocity | 0.726 (0.504 - 1.044) | 0.084 | 1.930 (0.897 - 4.153) | 0.093 |
| LVEF | 1.712 (0.945 - 3.103) | 0.076 | 0.805 (0.387 - 1.673) | 0.561 |
| LVEDD | 0.962 (0.944 - 0.980) | < 0.001 | 0.991 (0.964 - 1.018) | 0.502 |
| MAVD | 1.071 (1.037 - 1.106) | < 0.001 | 1.039 (0.989 - 1.092) | 0.132 |
| MR |  |  |  |  |
| none | Reference |  |  |  |
| mild | 0.579 (0.260 - 1.287) | 0.180 |  |  |
| moderate | 0.844 (0.350 - 2.039) | 0.707 |  |  |
| severe | 2.126 (0.864 - 5.233) | 0.101 |  |  |
| TR |  |  |  |  |
| none | Reference |  | Reference |  |
| mild | 1.408 (0.693 - 2.861) | 0.344 | 1.174 (0.542 - 2.540) | 0.684 |
| moderate | 2.931 (1.338 - 6.419) | 0.007 | 2.222 (0.907 - 5.443) | 0.081 |
| severe | 2.727 (0.893 - 8.326) | 0.078 | 1.421 (0.395 - 5.108) | 0.591 |
| Predilation | 0.300 (0.018 - 4.869) | 0.397 |  |  |
| Postdilation | 0.969 (0.546 - 1.721) | 0.915 |  |  |
| LVOT calcification | 0.914 (0.436 - 1.916) | 0.812 |  |  |
| Severe calcification | 1.977 (1.106 - 3.532) | 0.021 | 1.208 (0.596 - 2.448) | 0.600 |
| NC calcification | 1.000 (0.999 - 1.001) | 0.781 |  |  |
| RC calcification | 1.000 (0.998 - 1.001) | 0.657 |  |  |
| LC calcification | 1.001 (0.999 - 1.002) | 0.421 |  |  |
| Annulus area | 1.003 (1.001 - 1.004) | < 0.001 | 1.002 (1.001 - 1.004) | 0.008 |
| Aortic root angle | 1.011 (0.997 - 1.025) | 0.111 |  |  |

LVEF, left ventricular ejection fraction; LVEDD, left ventricular end diastolic diameter;; NC, non-coronary cusp; RC, right coronary cusp; LC, left coronary cusp; LVOT, left ventricular outflow tract; Diabetes mellitus; CAD, Coronary artery disease; MAVD, mixed aortic valve disease; MR, mitral regurgitation; TR, tricuspid regurgitation;
